# Supplementary material
Source: HighWire-hosted journal article supplement (https://bmjopen.bmj.com/content/7/11/e015860)
Supplement: inline-supplementary-material-2 [file inline-supplementary-material-2.pdf]

| Author                     | Date | Reference                                                                                                                                                                                                                                                                                                             | Reason for exclusion                                                                                                        |
|----------------------------|------|-----------------------------------------------------------------------------------------------------------------------------------------------------------------------------------------------------------------------------------------------------------------------------------------------------------------------|-----------------------------------------------------------------------------------------------------------------------------|
| Kirshbaum et al.           | 2007 | Kirshbaum MN. A review of the benefits of whole body exercise during and after treatment for breast cancer. <i>Journal of clinical nursing</i> . 2007.                                                                                                                                                                | This review was excluded as it was not a systematic review.                                                                 |
| Badr et al.                | 2013 | Badr H, Krebs P. A systematic review and meta-analysis of psychosocial interventions for couples coping with cancer. <i>Psycho-Oncology</i> . 2013.                                                                                                                                                                   | This review was excluded as it was not cancer survivors, who have completed active treatment.                               |
| Jones et al.               | 2006 | Jones LW, Demark-Wahnefried W. Diet, exercise, and complementary therapies after primary treatment for cancer. <i>The lancet oncology</i> . 2006.                                                                                                                                                                     | This review was excluded as it was not systematic.                                                                          |
| Burden et al.              | 2014 | Burden S, Gibson DJ, Todd C, Gratton EK, Pilling M, Lal S. Dietary interventions for adult cancer survivors. <i>The Cochrane Library</i> . 2014.                                                                                                                                                                      | This review was excluded as it was a protocol paper. We emailed the authors however, we were unable to find paper.          |
| Keesing et al.             | 2015 | Martin TA, Moran-Kelly RM, Roberts LM, Powe JG, Farrell SN, Singleton J. Effectiveness of individualized survivorship care plans on quality of life of adult female breast cancer survivors: a systematic review (provisional abstract). <i>JBI Database of systematic reviews and implementation reports</i> . 2015. | This paper was not a non-pharmacological psychosocial intervention.                                                         |
| Luckett et al.             | 2011 | Luckett T, Britton B, Clover K, Rankin NM. Evidence for interventions to improve psychological outcomes in people with head and neck cancer: a systematic review of the literature. <i>Supportive care in cancer</i> . 2011.                                                                                          | This review was excluded as it was not cancer survivors, who have completed active treatment.                               |
| Friendenreich and Courneya | 1996 | Friendenreich CM, Courneya KS. Exercise as rehabilitation for cancer patients (structured abstract). <i>Clinical Journal of Sport Medicine</i> . 1996.                                                                                                                                                                | This review was excluded as it was a structured abstract only. We emailed the authors however, we were unable to find paper |
| Cheng et al.               | 2014 | Cheng KK, Lim YT, Koh ZM, Tam WW. Home-based multidimensional survivorship programmes for breast cancer survivors. <i>The Cochrane Library</i> . 2014.                                                                                                                                                                | This review was excluded as it was a protocol paper. We emailed the authors however, we were unable to find paper.          |

|                      |      |                                                                                                                                                                                                                                                             |                                                                                                                                                                                       |
|----------------------|------|-------------------------------------------------------------------------------------------------------------------------------------------------------------------------------------------------------------------------------------------------------------|---------------------------------------------------------------------------------------------------------------------------------------------------------------------------------------|
| de Boer et al.       | 2011 | De Boer AG, Taskila T, Tamminga S, Frings-Dresen M, Feuerstein M, Verbeek J. Interventions to enhance return-to-work for cancer patients. <i>Cochrane Database Syst Rev.</i> 2011.                                                                          | This paper was excluded as QOL was not main outcome and it was not cancer survivors who had completed active treatment.                                                               |
| Solloway et al.      | 2016 | Yan JH, Pan L, Zhang XM, Sun CX, Cui GH. Lack of efficacy of Tai Chi in improving quality of life in breast cancer survivors: a systematic review and meta-analysis (provisional abstract). <i>Asian Pacific journal of cancer prevention: APJCP.</i> 2014. | This review was excluded as it was a provisional abstract only. We emailed the authors however, we were unable to find paper                                                          |
| Ledesma et al.       | 2009 | Ledesma D, Kumano H. Mindfulness-based stress reduction and cancer: a meta-analysis. <i>Psycho-Oncology.</i> 2009.                                                                                                                                          | This review was excluded as it was not cancer survivors, who have completed active treatment.                                                                                         |
| Scott et al.         | 2013 | Scott DA, Mills M, Black A, Cantwell M, Campbell A, Cardwell CR, Porter S, Donnelly M. Multidimensional rehabilitation programmes for adult cancer survivors. <i>The Cochrane Library.</i> 2013.                                                            | This paper was excluded as QOL was not main outcome                                                                                                                                   |
| Khan et al.          | 2013 | Khan F, Amatya B, Ng L, Drummond K, Olver J. Multidisciplinary rehabilitation after primary brain tumour treatment. <i>Cochrane Database syst rev.</i> 2013.                                                                                                | This review was excluded as it was not cancer survivors, who have completed active treatment.                                                                                         |
| Budhrani et al.      | 2014 | Budhrani P. Optimal Timing of Mindfulness-Based Stress Reduction in Cancer: Research Synthesis and State of the Science. <i>The Journal of Alternative and Complementary Medicine.</i> 2014.                                                                | We were unable to access the full paper. Authors confirmed this was a presentation rather than a paper.                                                                               |
| Oldervoll et al.     | 2004 | Oldervoll LM, Kaasa S, Hjermsstad MJ, Lund JÅ, Loge JH. Physical exercise results in the improved subjective well-being of a few or is effective rehabilitation for all cancer patients? (provisional abstract). <i>European Journal of Cancer.</i> 2004.   | This review was excluded as it was not cancer survivors, who have completed active treatment. It included only two primary papers with cancer survivors, and not analysed separately. |
| Casellas-Grau et al. | 2014 | Casellas-Grau A, Font A, Vives J. Positive psychology interventions in breast cancer. A systematic review. <i>Psycho-Oncology.</i> 2014.                                                                                                                    | This review was excluded as it was not cancer survivors, who have completed active treatment.                                                                                         |

|                         |      |                                                                                                                                                                                                                                                           |                                                                                               |
|-------------------------|------|-----------------------------------------------------------------------------------------------------------------------------------------------------------------------------------------------------------------------------------------------------------|-----------------------------------------------------------------------------------------------|
| Hulbert-Williams et al. | 2015 | Hulbert-Williams NJ, Storey L, Wilson KG. Psychological interventions for patients with cancer: psychological flexibility and the potential utility of Acceptance and Commitment Therapy. <i>European journal of cancer care</i> . 2015.                  | This review was excluded as it was not cancer survivors, who have completed active treatment. |
| Harder et al.           | 2012 | Harder H, Parlour L, Jenkins V. Randomised controlled trials of yoga interventions for women with breast cancer: a systematic literature review. <i>Supportive care in cancer</i> . 2012.                                                                 | This review was excluded as it was not cancer survivors, who have completed active treatment. |
| De Backer et al.        | 2009 | De Backer IC, Schep G, Backx FJ, Vreugdenhil G, Kuipers H. Resistance training in cancer survivors: a systematic review (provisional abstract). <i>International journal of sports medicine</i> . 2009.                                                   | This paper was excluded as QOL was not main outcome.                                          |
| Archer et al.           | 2015 | Archer S, Buxton S, Sheffield D. The effect of creative psychological interventions on psychological outcomes for adult cancer patients: a systematic review of randomised controlled trials. <i>Psycho-Oncology</i> . 2015.                              | This review was excluded as it was not cancer survivors, who have completed active treatment. |
| Piet et al.             | 2012 | Piet J, Würtzen H, Zachariae R. The effect of mindfulness-based therapy on symptoms of anxiety and depression in adult cancer patients and survivors: A systematic review and meta-analysis. <i>Journal of Consulting and Clinical Psychology</i> . 2012. | This paper was excluded as QOL was not main outcome.                                          |
| Cramp et al.            | 2010 | Cramp F, James A, Lambert J. The effects of resistance training on quality of life in cancer: a systematic literature review and meta-analysis. <i>Supportive care in cancer</i> . 2010.                                                                  | This review was excluded as it was not cancer survivors, who have completed active treatment. |
| Stan et al.             | 2012 | Stan DL, Collins NM, Olsen MM, Croghan I, Pruthi S. The evolution of mindfulness-based physical interventions in breast cancer survivors. <i>Evidence-Based Complementary and Alternative Medicine</i> . 2012.                                            | This paper was excluded as it is not a systematic review                                      |
| Bouma et al.            | 2015 | Bouma G, Admiraal JM, de Vries EG, Schröder CP, Walenkamp AM, Reyners AK. Internet-based support programs to alleviate psychosocial and physical                                                                                                          | This review was excluded as it was not cancer survivors, who have completed active treatment. |

symptoms in cancer patients: a literature analysis. *Critical reviews in oncology/hematology*. 2015.

---

|               |      |                                                                                                                                                                                                                      |                                                                                               |
|---------------|------|----------------------------------------------------------------------------------------------------------------------------------------------------------------------------------------------------------------------|-----------------------------------------------------------------------------------------------|
| Bourke et al. | 2016 | Bourke L, Smith D, Steed L, Hooper R, Carter A, Catto J, Albertsen PC, Tombal B, Payne HA, Rosario DJ. Exercise for men with prostate cancer: a systematic review and meta-analysis. <i>European urology</i> . 2016. | This review was excluded as it was not cancer survivors, who have completed active treatment. |
| Post et al.   | 2016 | Post KE, Flanagan J. Web based survivorship interventions for women with breast cancer: An integrative review. <i>European Journal of Oncology Nursing</i> . 2016.                                                   | This paper was excluded as QOL was not main outcome.                                          |
